# Supplementary material
Source: PubMed Central journal article supplement (PMC6527157)
Supplement: supp_RA118.006347_141441_2_supp_307158_pp1jqc.pdf [file supp_RA118.006347_141441_2_supp_307158_pp1jqc.pdf]

Table S1

| <b>Mutation</b>       | <b>Mitochondrial Morphology</b>           |
|-----------------------|-------------------------------------------|
| Mfn1 <sup>R83W</sup>  | Fragmented, short tubules                 |
| Mfn1 <sup>H107R</sup> | Fragmented, aggregated fragments          |
| Mfn1 <sup>T109A</sup> | Fragmented                                |
| Mfn1 <sup>A143V</sup> | Short tubules                             |
| Mfn1 <sup>H144R</sup> | Fragmented                                |
| Mfn1 <sup>D178A</sup> | Fragmented                                |
| Mfn1 <sup>F202L</sup> | Highly elongated, perinuclear collapse    |
| Mfn1 <sup>P230A</sup> | Reticular                                 |
| Mfn1 <sup>V252G</sup> | Fragmented, short tubules, some reticular |
| Mfn1 <sup>Q255R</sup> | Fragmented                                |
| Mfn1 <sup>R259H</sup> | Short tubules, reticular                  |
| Mfn1 <sup>F263Y</sup> | Reticular                                 |

Functional screen of Mfn1 GTPase domain mutant variants. Description of the mitochondrial morphology of GTPase domain mutant variants generated in Mfn1-eGFP and expressed in Mfn1<sup>-/-</sup> Mfn2<sup>+/+</sup> cells by retroviral transduction.

A

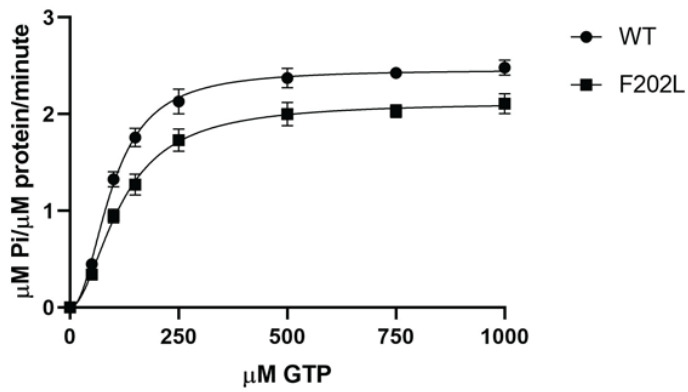

B

|       | WT    | F202L |
|-------|-------|-------|
| Vmax  | 2.461 | 2.123 |
| h     | 2.119 | 1.884 |
| Khalf | 96.51 | 116.6 |

### Figure S1

Kinetic analysis of GTP hydrolysis of Mfn1<sub>IMC</sub> and Mfn1<sup>F202L</sup><sub>IMC</sub>. **(A)** A representative kinetic plot fit to an allosteric sigmoidal equation is shown. **(B)** Kinetic parameters for Mfn1<sub>IMC</sub> and Mfn1<sup>F202L</sup><sub>IMC</sub>.

**A**

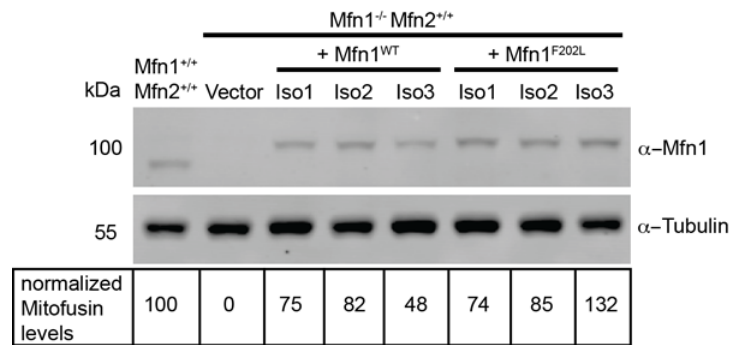

**B**

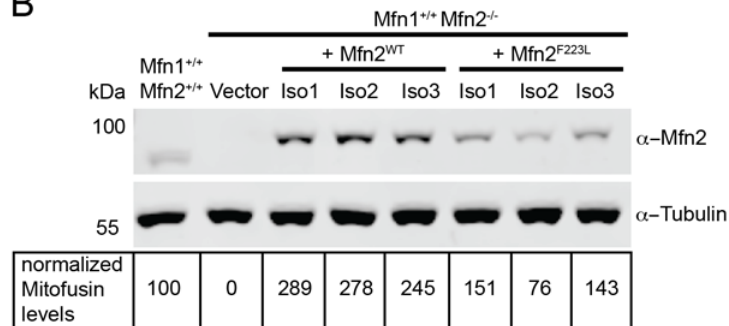

**Figure S2**

Mitofusin-FLAG protein expression in MEF clonal populations. **(A)** Whole-cell lysates prepared from indicated cell lines were subjected to SDS-PAGE and immunoblotting with  $\alpha$ -Mfn1 and  $\alpha$ -Tubulin. Protein loading was normalized to Tubulin and for each clonal population, the relative amount of Mfn1-FLAG to endogenous Mfn1 is listed below. **(B)** Whole-cell lysates prepared from indicated cell lines were subjected to SDS-PAGE and immunoblotting with  $\alpha$ -Mfn2 and  $\alpha$ -Tubulin. Protein loading was normalized to Tubulin and for each clonal population, the relative amount of Mfn2-FLAG to endogenous Mfn2 is listed below.

Figure S3

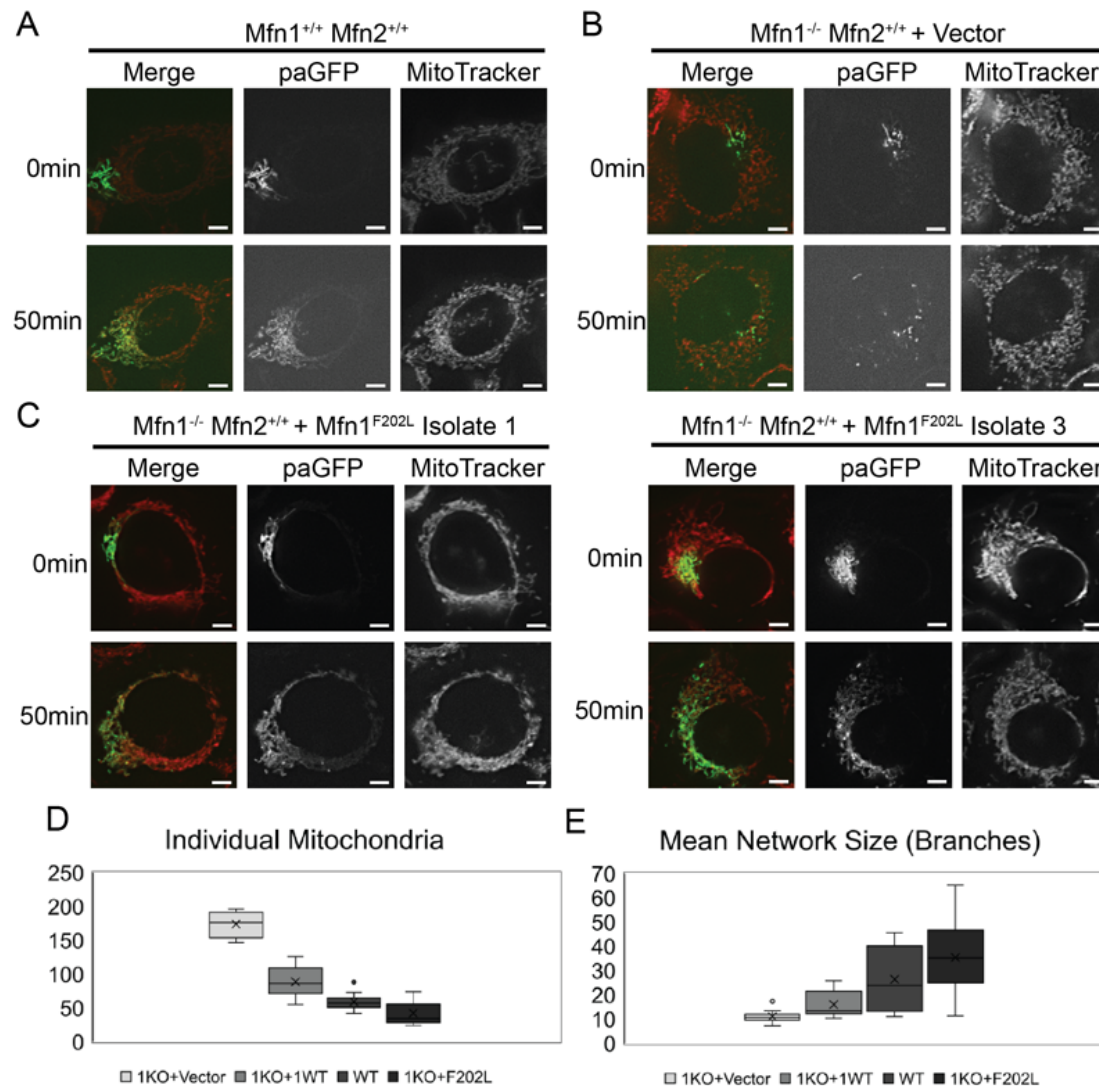

Figure S3

Mitochondrial connectivity and fusion as measured by redistribution of GFP. Wildtype (A) or clonal populations of Mfn1-null cells transduced with empty vector (B) or Mfn1<sup>F202L</sup> (C) transduced with mitochondrial matrix-targeted photoactivatable-GFP (mt-paGFP) were labeled with MitoTracker Red CMXRos and visualized by fluorescence microscopy. A small region of the cell that contained mitochondria (approximately 1 micron square) was activated using a 405 nm laser (t=0 min) and the same cell was re-imaged 50 minutes later (t=50 min). The Pearson's correlation co-efficient for red and green pixels was calculated as a measure of GFP spreading through the mitochondrial network. For wildtype controls, the co-efficient was 0.32 at t=0 and 0.627 at t=50; for empty vector, the co-efficient was 0.09 at t=0 and 0.077 at t=50; for F202L isolate 1, the co-efficient was 0.315 at t=0 and 0.603 at t=50; for F202L isolate 3, the co-efficient was 0.459 at t=0 and 0.653 at t=50. Mitochondrial network analysis was performed with the Image J MiNa plugin to assess the number of individual mitochondria (D) and the mean network

size (E) in wildtype, or clonal populations of Mfn1-null cells transduced with empty vector or expressing Mfn1F202L.

## Figure S4

A

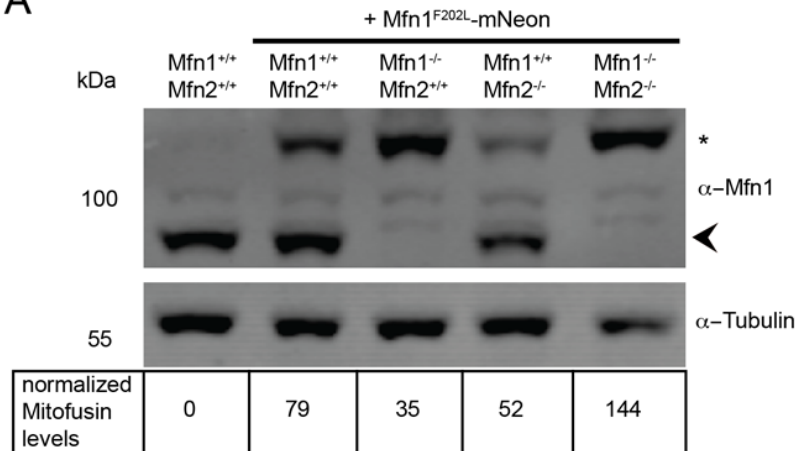

B

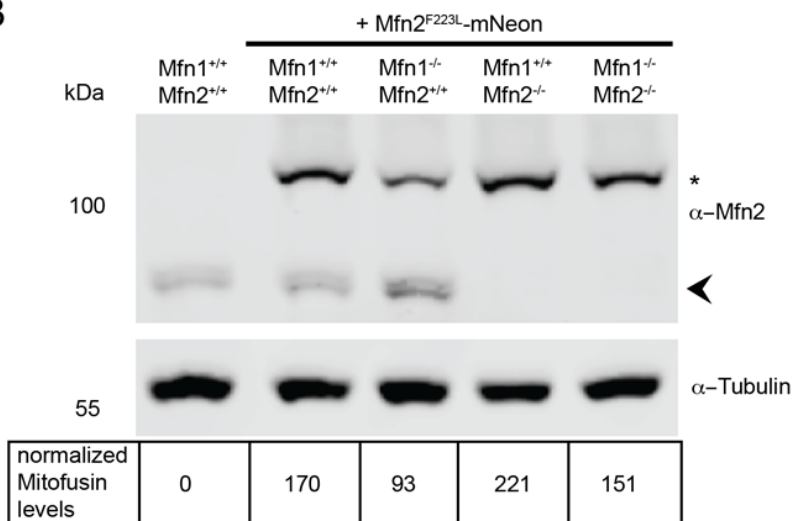

### Figure S4

Mitofusin-mNeon protein expression in MEFs of the indicated genotype. **(A)** Whole-cell lysates prepared from indicated cell lines expressing Mfn1<sup>F202L</sup>-mNeon were subjected to SDS-PAGE and immunoblotting with α-Mfn1 and α-Tubulin. Protein loading was normalized to Tubulin and for each cell line, the relative amount of Mfn1-mNeon to endogenous Mfn1 is listed below. **(B)** Whole-cell lysates prepared from indicated cell lines expressing Mfn2<sup>F223L</sup>-mNeon were subjected to SDS-PAGE and immunoblotting with α-Mfn2 and α-Tubulin. Protein loading was normalized to Tubulin and for each cell line, the relative amount of Mfn2-mNeon to endogenous Mfn2 is listed below. Arrowhead indicated endogenous Mitofusin and asterisk indicates Mitofusin with C-terminal mNeonGreen.

## Figure S5

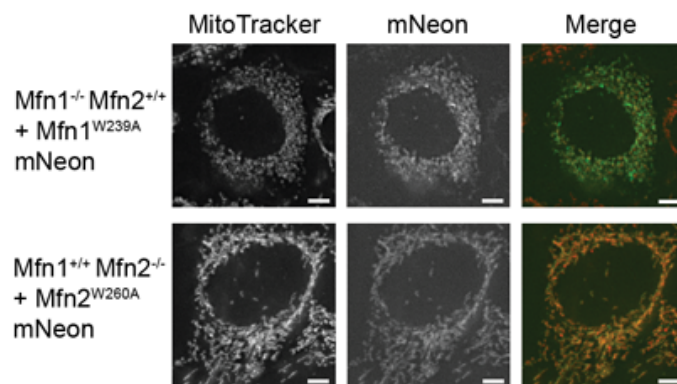

### Figure S5

Functional assessment of Mfn1<sup>W239A</sup> and Mfn2<sup>W260A</sup>. Representative images of Mfn1-null cells expressing Mfn1<sup>W239A</sup>-mNeon and Mfn2-null cells expressing Mfn2<sup>W260A</sup>-mNeon following viral transduction. Mitochondria were labeled with MitoTracker Red CMXRos and visualized by fluorescence microscopy. Images represent maximum intensity projections. Scale bars are 5  $\mu$ M.

Figure S6

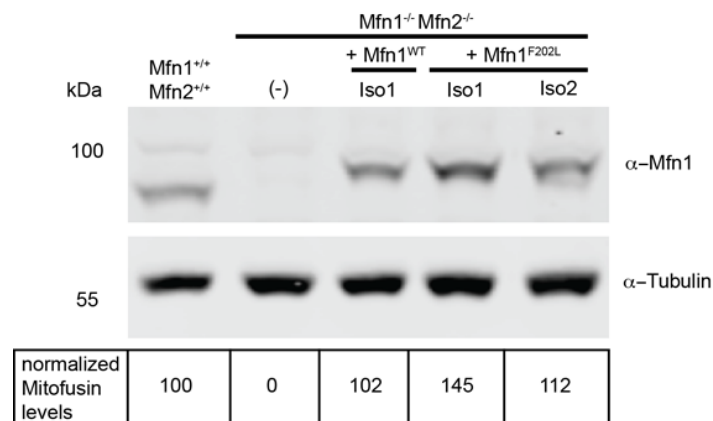

**Figure S6**

Mfn1-FLAG and Mfn1<sup>F202L</sup>-FLAG protein expression in Mfn1/2-null clonal populations. Whole-cell lysates prepared from indicated cell lines were subjected to SDS-PAGE and immunoblotting with  $\alpha$ -Mfn1 and  $\alpha$ -Tubulin. Protein loading was normalized to Tubulin and for each clonal population, the relative amount of Mfn1-FLAG to endogenous Mfn1 is listed below.



Figure S7

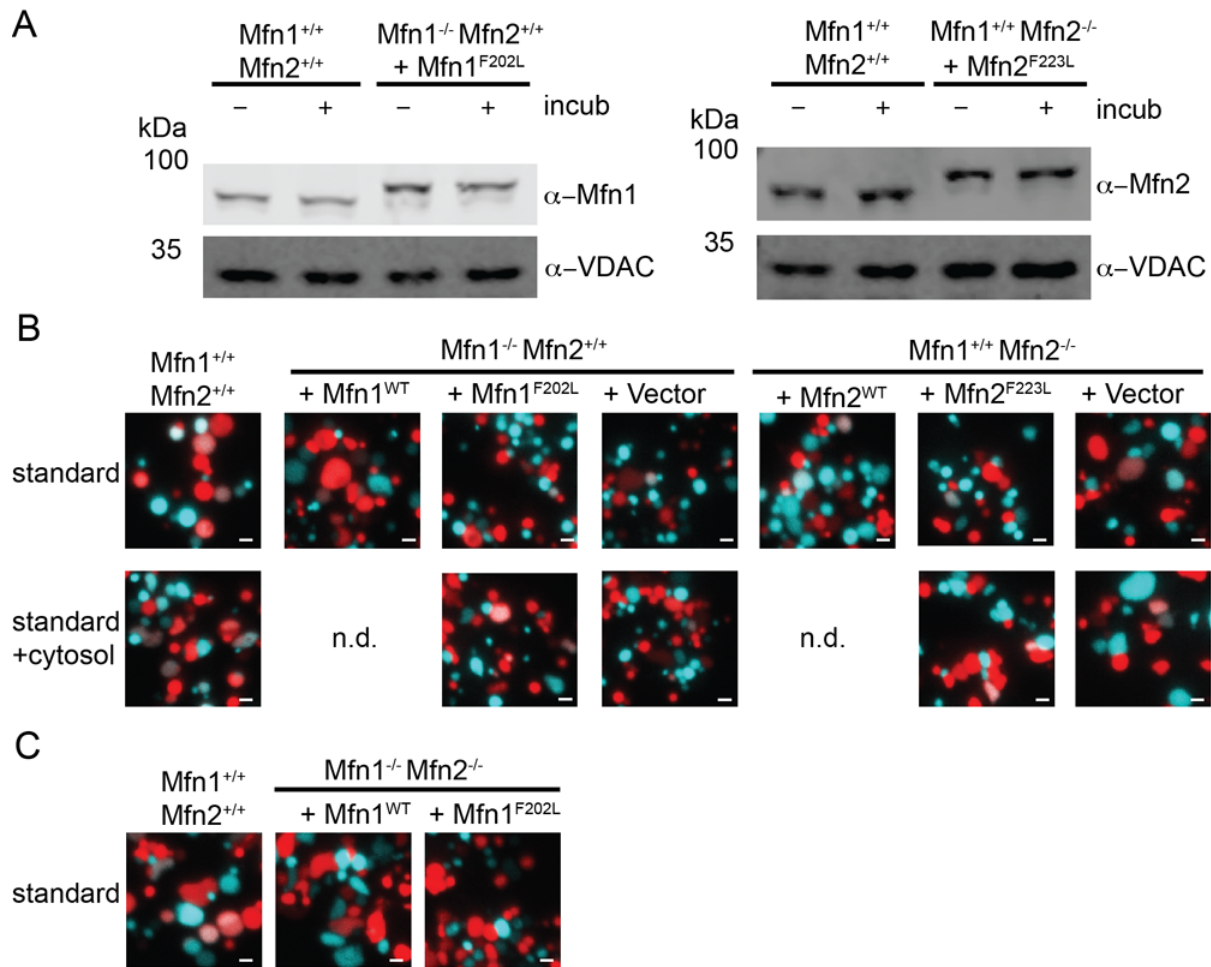

**Figure S7**

Mitofusin protein stability and mitochondrial morphology in vitro. **(A)** To assess the protein stability under the in vitro fusion conditions, isolated mitochondria were either left untreated (-) or were subject to in vitro fusion conditions (+) prior to analysis by SDS-PAGE and immunoblotting with  $\alpha$ -Mfn1,  $\alpha$ -Mfn2 and,  $\alpha$ -VDAC. **(B)** Representative images from in vitro fusion reactions described in Figure 5A & B. **(C)** Representative images from in vitro fusion reactions described in Figure 5D.

Figure S8

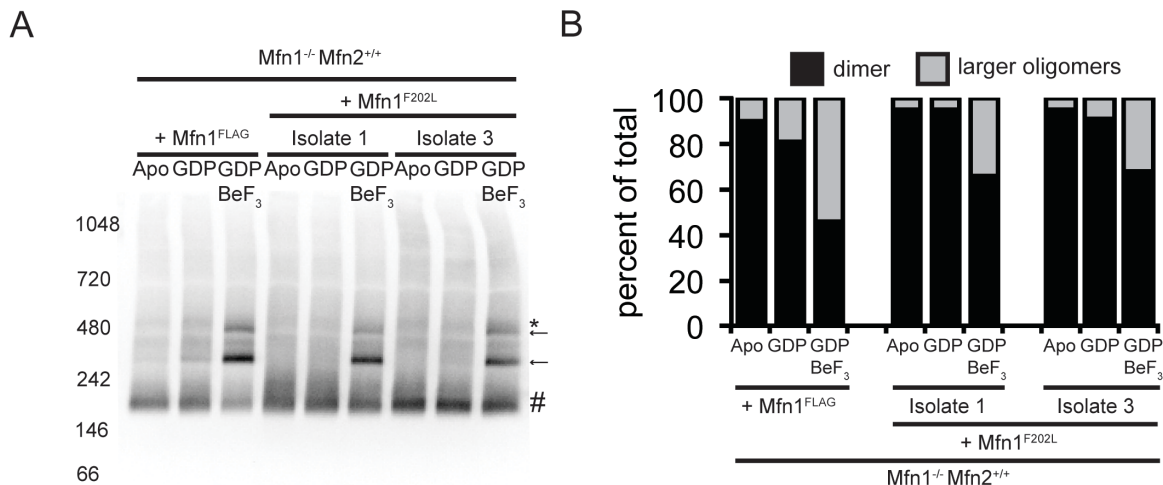

**Figure S8**

Mfn1<sup>F202L</sup> has impaired nucleotide dependent assembly. **(A)** Mitochondria were isolated from indicated cell lines, either left untreated, or were incubated with the indicated nucleotide condition prior to lysis, and were then subjected to BN-PAGE and immunoblotted with  $\alpha$ -FLAG. # denotes the predicted dimer state, arrows denote the larger oligomeric species and \* denotes a non-specific band. **(B)** The percentage of total protein in the smaller oligomeric state (#)(predicted dimer) and the higher oligomeric states (arrows) for each condition in (A) is represented in the bar graph.

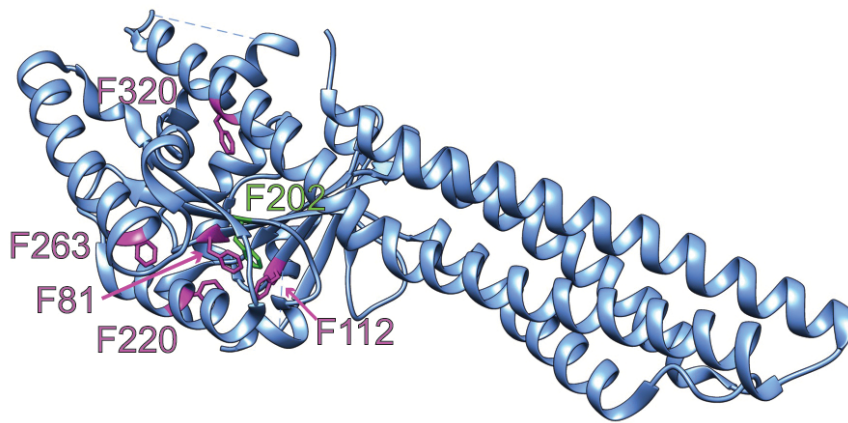

**Figure S9**

Aromatic network that includes F202 as well as F81, F112, F219, F220, F263 and F320 (PDB 5G04).
